# Supplementary material
Source: PubMed Central journal article supplement (PMC3795871)

## ONLINE SUPPLEMENTAL MATERIAL

### **Figure S1. Plexin B2 is required for the IFN $\gamma$ response to DSS-induced colitis.**

Quantitative RT-PCR for IFN $\gamma$  in distal colon of untreated or DSS-treated mice following 48hr *in vitro* culture in the presence or absence of anti-plexin B2 mAb. Data represents IFN $\gamma$  mRNA expression relative to  $\beta$ -actin mRNA and is expressed in arbitrary units.

**Figure S2. Normal architecture and integrity of the colon in CD100<sup>-/-</sup> mice.** (a) CD3 immunofluorescence staining of untreated colon from WT and CD100<sup>-/-</sup> mice. Sections were counterstained with DAPI. (b) Alcian Blue/Nuclear Fast Red (top panels) and Periodic Acid/Schiff's Base (bottom panels) staining of untreated paraffin embedded sections of large intestine from WT, CD100<sup>-/-</sup> and  $\gamma\delta$ TCR<sup>-/-</sup> animals. Digital images were acquired at 200x. Scale bar = 50 $\mu$ m

**Figure S3. Severe DSS induced colitis in CD100<sup>-/-</sup> mice.** (a) Criteria used in histological disease scores. (b) 3 days after removal of DSS, disease scores were assessed in WT and CD100<sup>-/-</sup> mice (mean  $\pm$  SD, n=14 per group, \* = p < 0.05 compared to WT). (c) Disease scores 14 days after removal of DSS (n=6 per group, \* = p < 0.05 compared to WT).

**Figure S4. IEL in CD100<sup>-/-</sup> mice are activated to produce TNF $\alpha$  following DSS-induced colitis.** Intracellular FACS staining for TNF $\alpha$  in  $\gamma\delta$  IEL from WT and CD100<sup>-/-</sup> mice 2 days after removal of DSS. Cells are gated on  $\gamma\delta$ TCR expression.

**Figure S5. Altered IEL proliferation in CD100<sup>-/-</sup> mice.** Proliferation of IEL in WT mice and CD100<sup>-/-</sup> mice as assessed by *in vivo* BrdU incorporation. (a) Percentage of  $\gamma\delta$  IEL incorporating BrdU in WT and CD100<sup>-/-</sup> mice was assessed by flow cytometry analysis (n=3, mean + SD, \* = p < 0.05 compared to WT untreated). No significant difference was found between untreated and DSS-treated CD100<sup>-/-</sup> mice. (b) Representative example of BrdU incorporation by  $\gamma\delta$  IEL. Data is representative of three experiments. (c) Percentage of BrdU<sup>+</sup>  $\alpha\beta$  IEL (mean  $\pm$  SD of three separate experiments, \* = p < 0.05 compared to WT untreated). (d) Representative example of BrdU incorporation by  $\alpha\beta$  IEL. Data is representative of three experiments.

**Figure S6.  $\gamma\delta$  IEL from CD100<sup>-/-</sup> are not activated under homeostatic conditions.**

Intracellular FACS staining for TNF $\alpha$ , IFN $\gamma$  and IL-17 in  $\gamma\delta$  IEL from untreated WT and CD100<sup>-/-</sup> mice. Cells are gated on  $\gamma\delta$ TCR expression.

**Figure S7. Acute inflammatory responses and apoptosis are not altered in CD100<sup>-/-</sup>**

**animals.** (a) Time course of myeloperoxidase (MPO) activity in the colon of WT and CD100<sup>-/-</sup> mice following DSS treatment. (b) Annexin V and propidium iodide staining of colon epithelial cells from WT and CD100<sup>-/-</sup> mice that were either untreated, or had been treated with DSS for 5 days and analyzed 3 days following the removal of DSS.

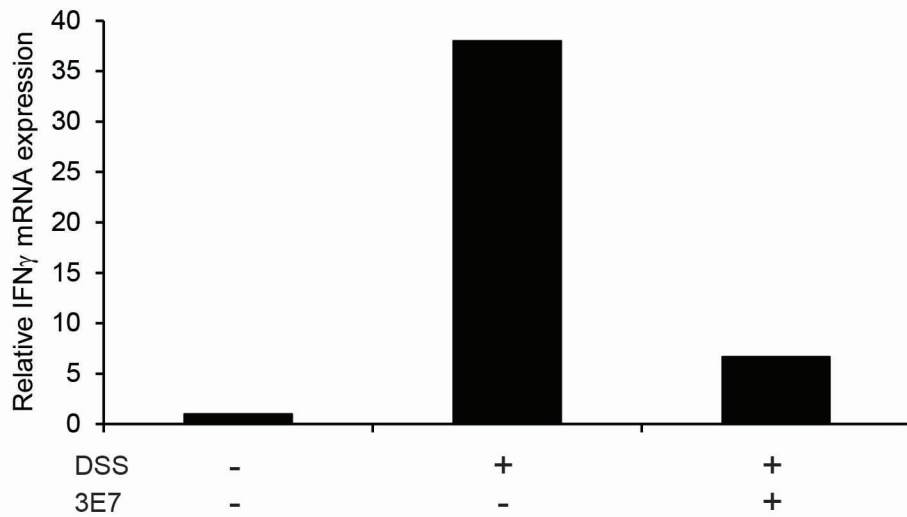

WT

CD100<sup>-/-</sup>

control

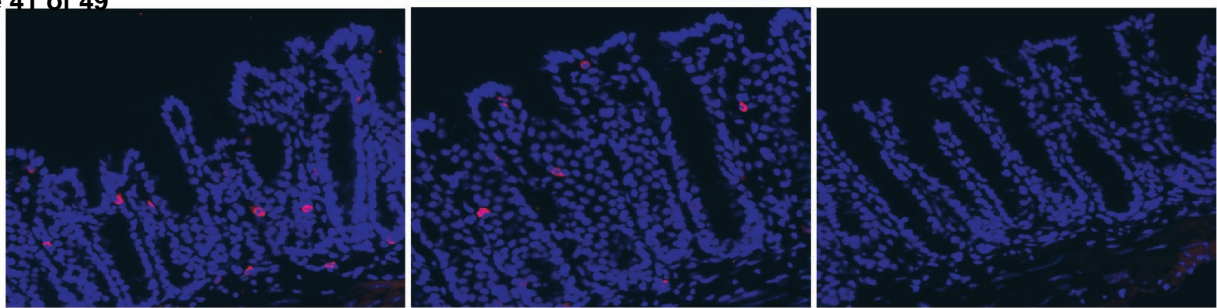

**b**

WT

CD100<sup>-/-</sup>

$\gamma\delta$  TCR<sup>-/-</sup>

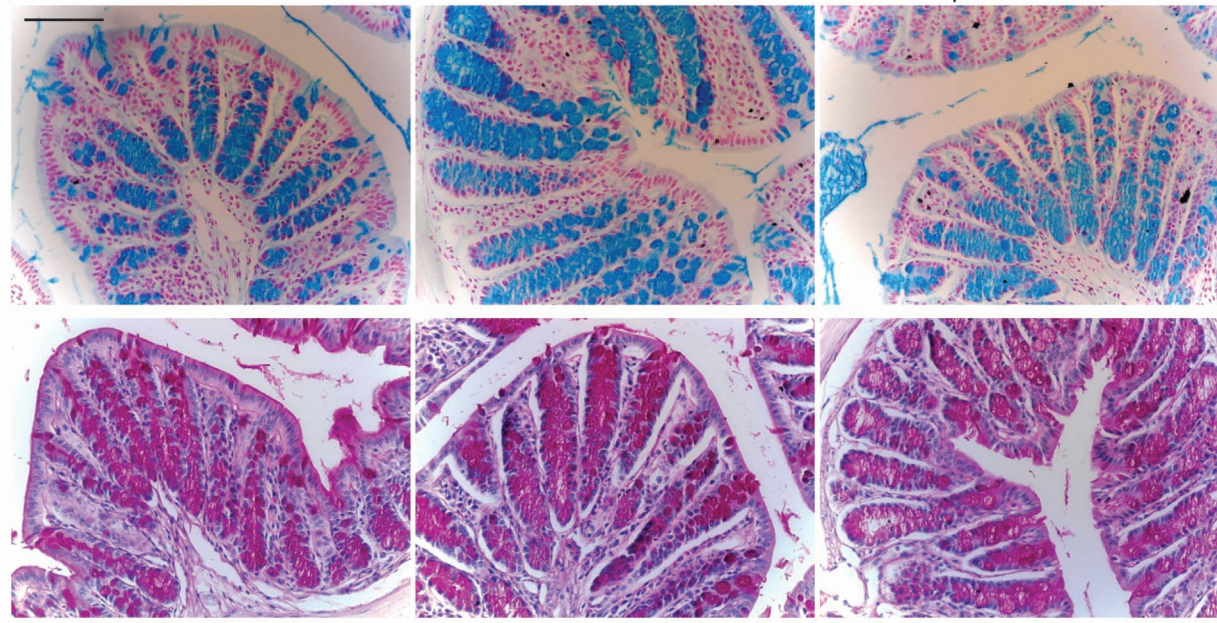

Figure S2

a

| Epithelium                                                                                                                                                       | Mucosa                                                                              | Submucosa                                                             |
|------------------------------------------------------------------------------------------------------------------------------------------------------------------|-------------------------------------------------------------------------------------|-----------------------------------------------------------------------|
| <b>No Ulcer Present</b><br>0 = Normal<br>1 = Hyperproliferation<br>2 = 10-50% loss of crypt length<br>3 = 50-90% loss of crypt length<br>4 = Complete crypt loss | 0 = None<br>1 = Mild infiltrate<br>2 = Moderate infiltrate<br>3 = Severe infiltrate | 0 = None<br>1 = Mild infiltrate and/or edema<br>2 = Severe infiltrate |
|                                                                                                                                                                  |                                                                                     | Muscularis                                                            |
| <b>Ulcer Present</b><br>5 = Ulcer less than 10 crypt widths<br>6 = Ulcer greater than 10 crypt widths                                                            |                                                                                     | 0 = Not involved<br>1 = Involved                                      |

b

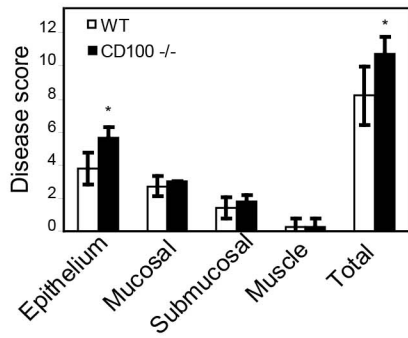

c

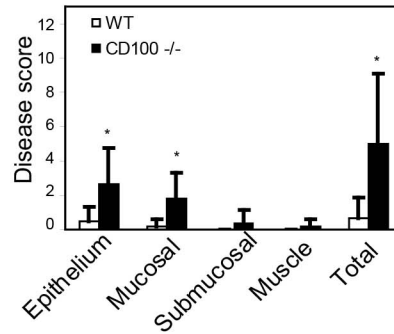

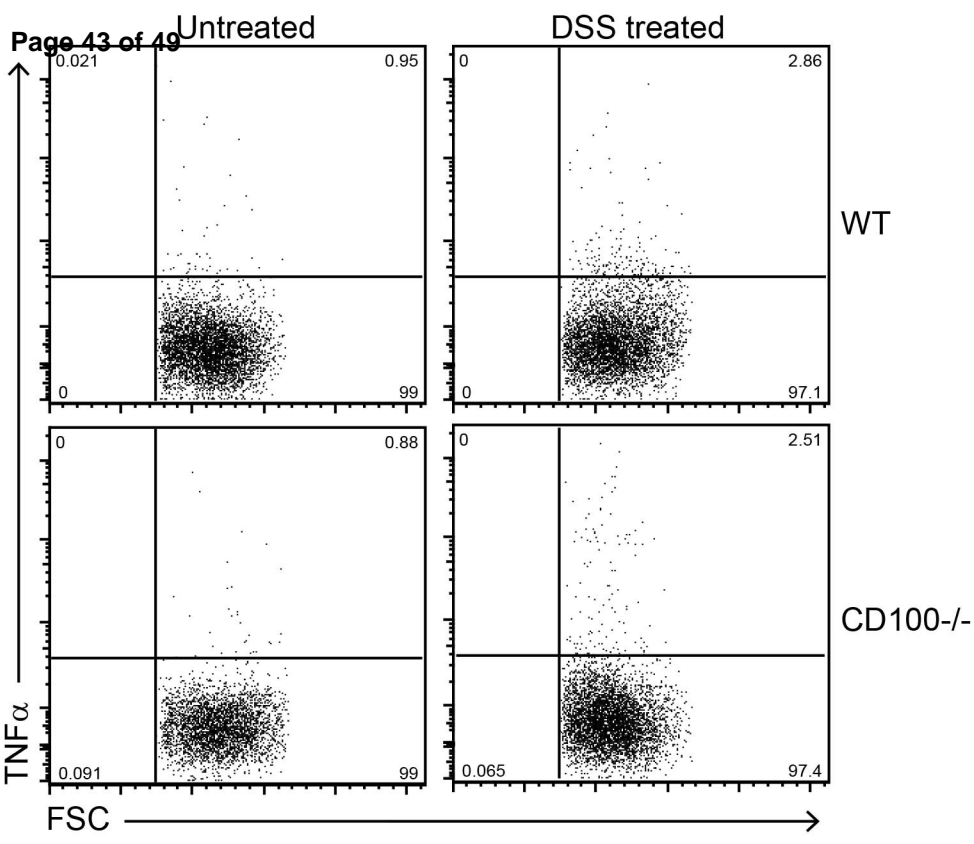

Figure S4

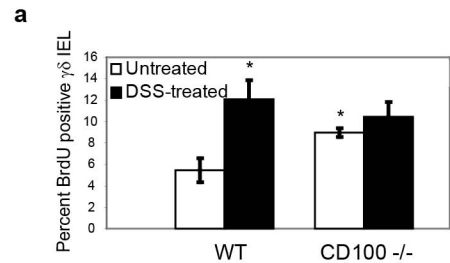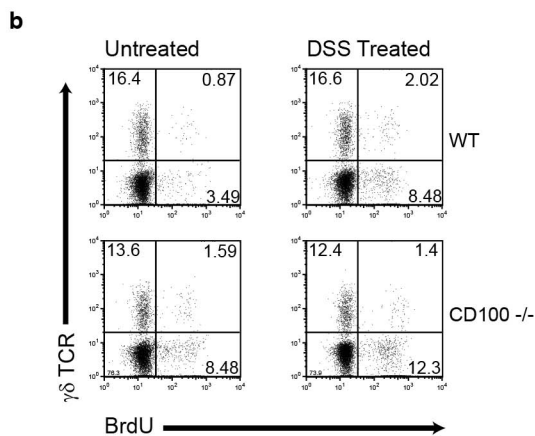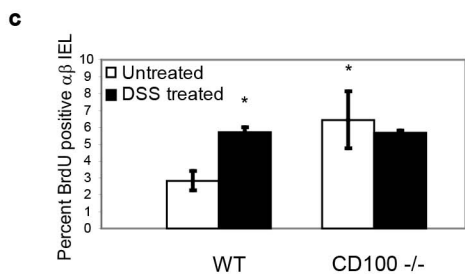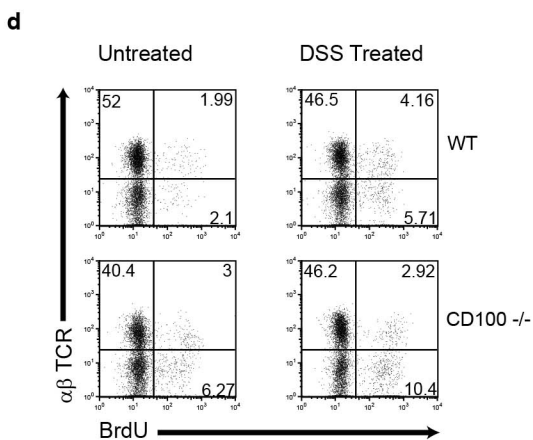

WT

CD100<sup>-/-</sup>

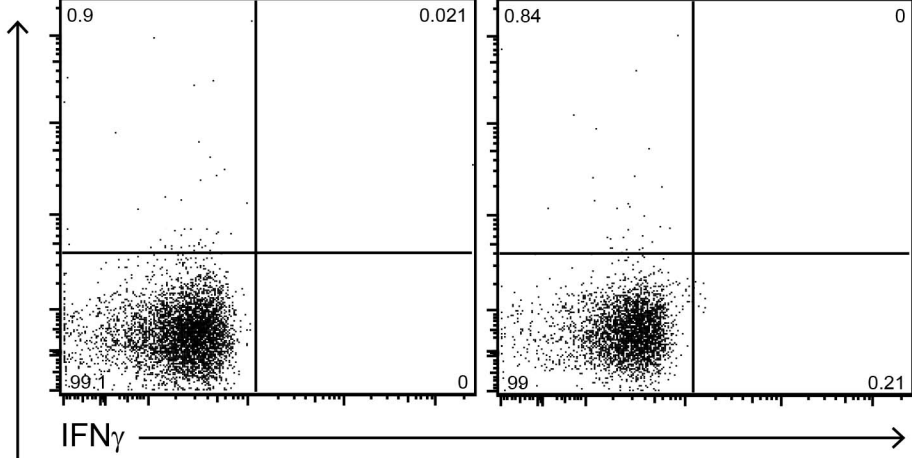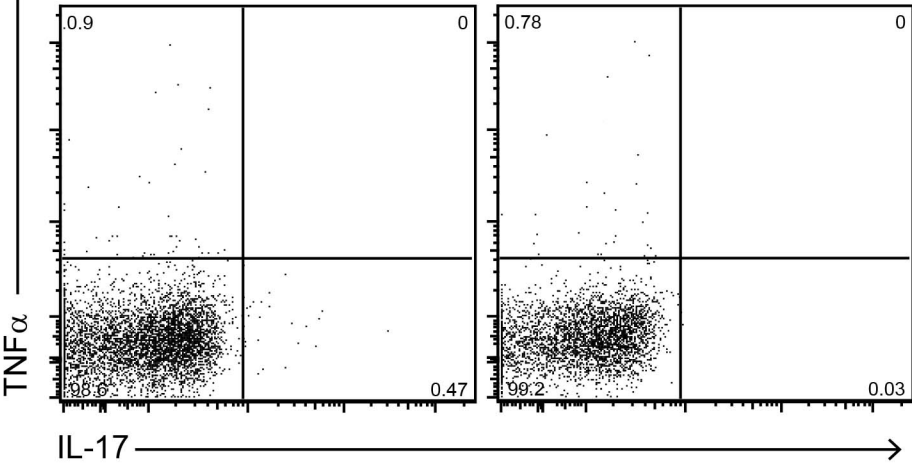

Figure S6



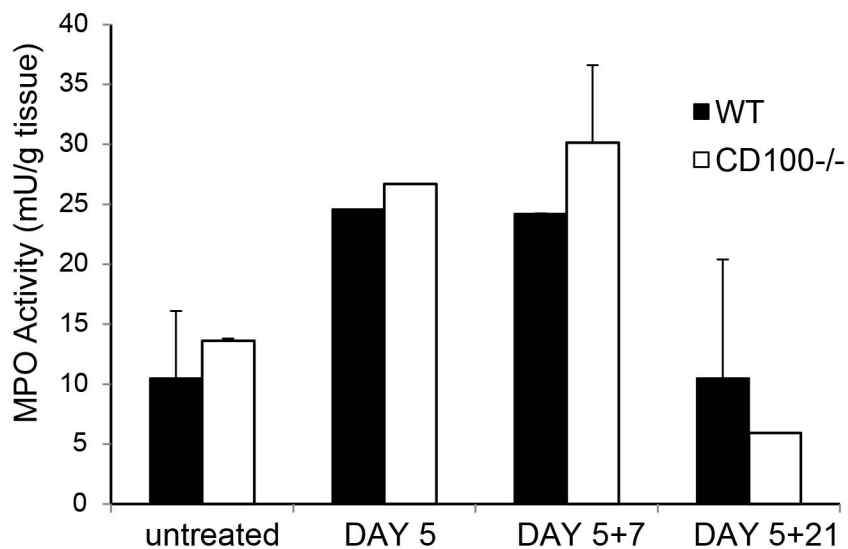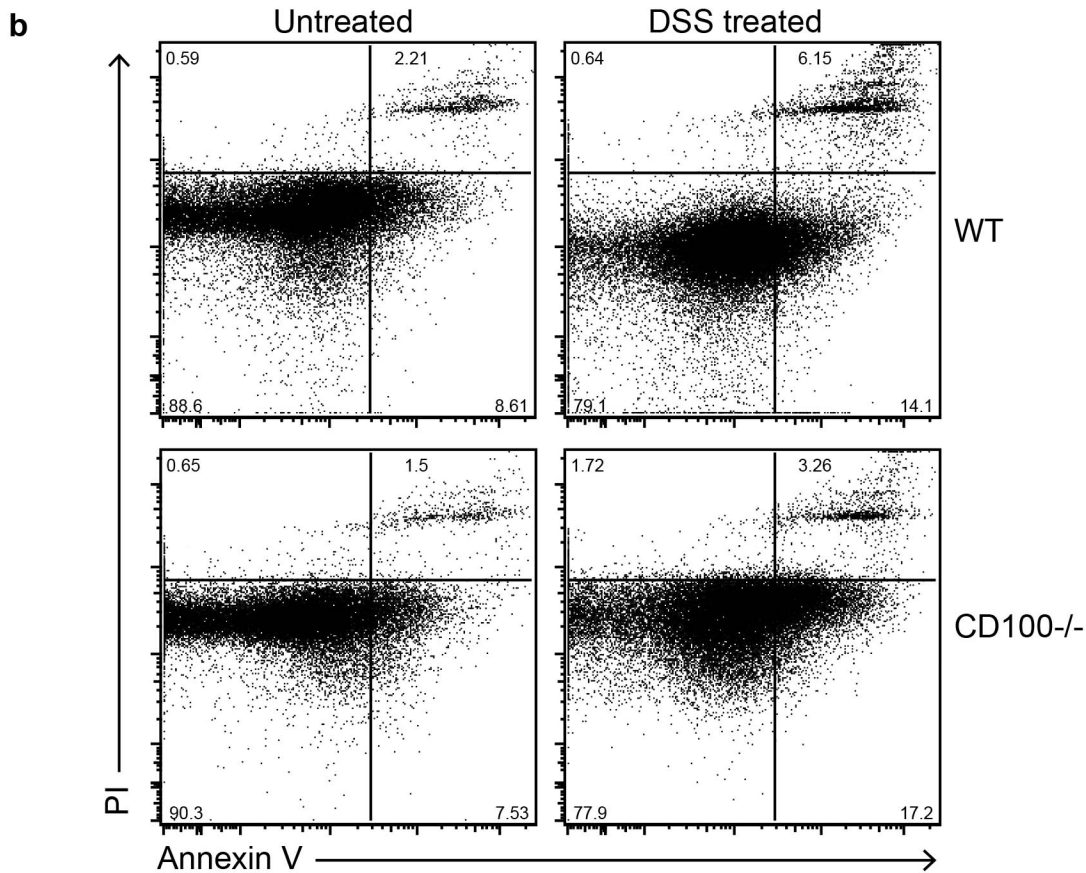

Supplement: NIHMS472451-supplement-supplement_1.pdf [file NIHMS472451-supplement-supplement_1.pdf]
